# Supplementary material for: Understanding the Effect of Ionic Liquid–Mediated Solvent Engineering on the Kinetics and Thermodynamic Stability of Phenylalanine Ammonia-Lyase
Source: PubMed Central journal article supplement (PMC11440588; doi:10.1021/acs.jpcb.4c04272), 2024-09-13
Supplement: jp4c04272_si_001.pdf [file jp4c04272_si_001.pdf]

## Supplementary information

### Understanding the Effect of Ionic Liquid Mediated Solvent Engineering on the Kinetics and Thermodynamic Stability of Phenylalanine Ammonia-lyase

Pranav Bharadwaj,<sup>‡,1,2</sup> Avishak Barua,<sup>‡,1</sup> Meena Bisht,<sup>1,3</sup> Dheeraj Kumar Sarkar,<sup>4</sup> Sagar Biswas,<sup>1</sup> Gregory Franklin\*<sup>1</sup> and Dibyendu Mondal\*<sup>1,2</sup>

<sup>1</sup> Institute of Plant Genetics (IPG), Polish Academy of Sciences, Strzeszyńska 34, 60-479 Poznań, Poland.

<sup>2</sup> Centre for Nano and Material Sciences, Jain (Deemed-to-be University), Jain Global Campus, Kanakapura, Bangalore, Karnataka, India.

<sup>3</sup> Department of Chemistry, Sri Venkateswara College, University of Delhi, Dhaula Kuan, New Delhi 110021, India.

<sup>4</sup> Tata Institute of Fundamental Research, Hyderabad 50046, India.

‡. PB and AB have contributed equally towards this work.

\*Corresponding authors, e-mail: GF: [fgre@igr.poznan.pl](mailto:fgre@igr.poznan.pl); DM: [m.dibyendu@jainuniversity.ac.in](mailto:m.dibyendu@jainuniversity.ac.in); [dmon@igr.poznan.pl](mailto:dmon@igr.poznan.pl)

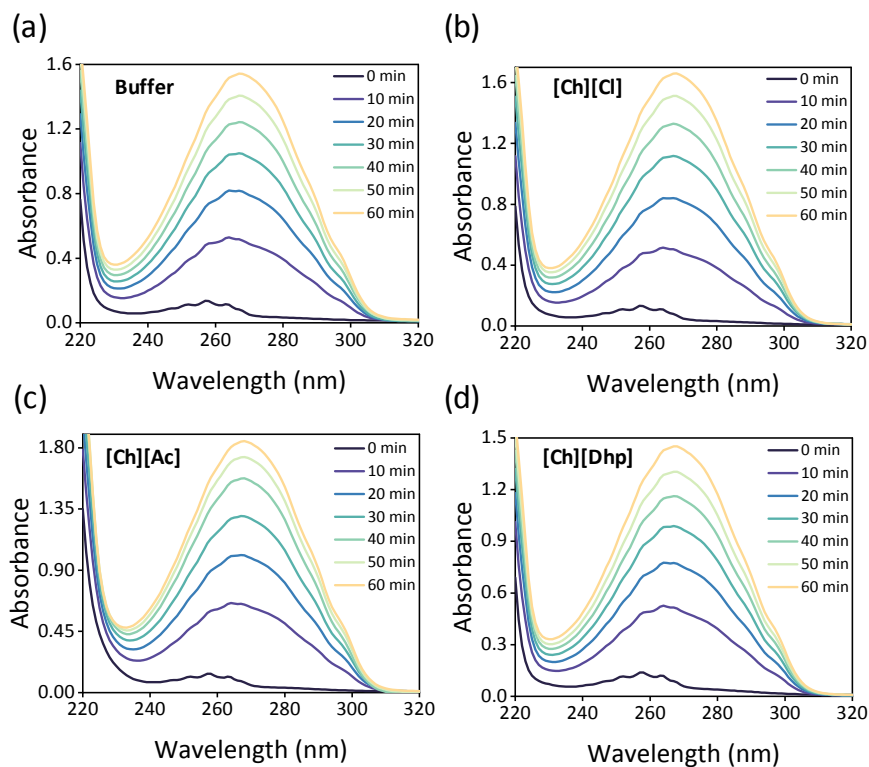

**Figure S1.** UV-Vis spectra of course of the *RgPAL* activity assay using in (a) Tris-HCl buffer and (b-d) ionic liquid media.

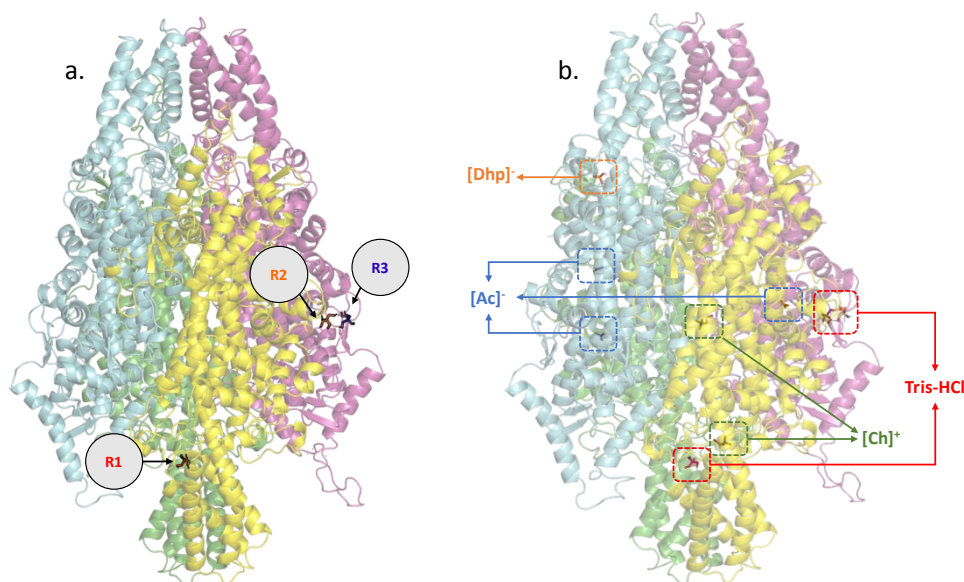

**Figure S2.** Peptide chains A, B, C and D of *RgPAL* are shown in green, cyan, magenta and yellow, respectively with (a) top docked poses of Tris-HCl on the high affinity cavities of *RgPAL* from replicate 1 (red), replicate 2 (blue) and replicate 3 (orange) and (b) Top docked poses of Tris-HCl, dihydrogenphosphate ([Dhp]<sup>-</sup>), acetate ([Ac]<sup>-</sup>) and choline ([Ch]<sup>+</sup>) on the high affinity cavities of *RgPAL*.

**Table S1.** Docking score for Tris HCl with respect to the ten poses and the binding affinity scores for replicate 1 (R1-SCORE), replicate 2 (R2-SCORE) and replicate 3 (R3-SCORE). Energy scores are in kcal/mol units.

| RANK | NAME     | POSE | R1-SCORE | R2-SCORE | R3-SCORE |
|------|----------|------|----------|----------|----------|
| 1    | Tris HCl | 1    | -4.5     | -4.3     | -4.6     |
| 2    | Tris HCl | 2    | -4.3     | -4.3     | -4.3     |
| 3    | Tris HCl | 3    | -4       | -4.3     | -4.3     |
| 4    | Tris HCl | 4    | -3.9     | -4.2     | -4.1     |
| 5    | Tris HCl | 5    | -3.8     | -4       | -4.1     |
| 6    | Tris HCl | 6    | -3.6     | -4       | -4       |
| 7    | Tris HCl | 7    | -3.6     | -4       | -4       |
| 8    | Tris HCl | 8    | -3.6     | -4       | -3.9     |
| 9    | Tris HCl | 9    | -3.6     | -4       | -3.9     |
| 10   | Tris HCl | 10   | -3.6     | -3.9     | -3.8     |

**Table S2.** Docking score for Acetate with respect to the ten poses and the binding affinity scores for replicate 1 (R1-SCORE), replicate 2 (R2-SCORE) and replicate 3 (R3-SCORE).

| RANK | NAME    | POSE | R1-SCORE | R2-SCORE | R3-SCORE |
|------|---------|------|----------|----------|----------|
| 1    | Acetate | 1    | -3.3     | -3.2     | -3.3     |
| 2    | Acetate | 2    | -3.1     | -3       | -3.3     |
| 3    | Acetate | 3    | -3.1     | -3       | -3       |
| 4    | Acetate | 4    | -3.1     | -3       | -3       |
| 5    | Acetate | 5    | -3       | -3       | -2.9     |
| 6    | Acetate | 6    | -3       | -3       | -2.9     |
| 7    | Acetate | 7    | -2.9     | -2.9     | -2.9     |
| 8    | Acetate | 8    | -2.9     | -2.8     | -2.8     |
| 9    | Acetate | 9    | -2.8     | -2.8     | -2.8     |
| 10   | Acetate | 10   | -2.8     | -2.8     | -2.7     |

**Table S3.** Docking score for Choline with respective to the ten poses and the binding affinity scores for replicate 1 (R1-SCORE), replicate 2 (R2-SCORE) and replicate 3 (R3-SCORE).

| RANK | NAME    | POSE | R1-SCORE | R2-SCORE | R3-SCORE |
|------|---------|------|----------|----------|----------|
| 1    | Choline | 1    | -3.5     | -3.6     | -3.5     |
| 2    | Choline | 2    | -3.5     | -3.5     | -3.4     |
| 3    | Choline | 3    | -3.5     | -3.5     | -3.4     |
| 4    | Choline | 4    | -3.4     | -3.5     | -3.4     |
| 5    | Choline | 5    | -3.4     | -3.5     | -3.3     |
| 6    | Choline | 6    | -3.4     | -3.3     | -3.3     |
| 7    | Choline | 7    | -3.3     | -3.3     | -3.3     |
| 8    | Choline | 8    | -3.2     | -3.2     | -3.3     |
| 9    | Choline | 9    | -3.2     | -3.2     | -3.3     |
| 10   | Choline | 10   | -3.2     | -3.2     | -3.2     |

**Table S4.** Docking score for dihydrogenphosphate with respective to the ten poses and the binding affinity scores for replicate 1 (R1-SCORE), replicate 2 (R2-SCORE) and replicate 3 (R3-SCORE).

| RANK | NAME                | POSE | R1-SCORE | R2-SCORE | R3-SCORE |
|------|---------------------|------|----------|----------|----------|
| 1    | Dihydrogenphosphate | 1    | -4.1     | -4.1     | -4.1     |
| 2    | Dihydrogenphosphate | 2    | -4.1     | -4.1     | -4.1     |
| 3    | Dihydrogenphosphate | 3    | -3.9     | -3.9     | -3.9     |
| 4    | Dihydrogenphosphate | 4    | -3.8     | -3.8     | -3.9     |
| 5    | Dihydrogenphosphate | 5    | -3.8     | -3.8     | -3.9     |
| 6    | Dihydrogenphosphate | 6    | -3.8     | -3.8     | -3.8     |
| 7    | Dihydrogenphosphate | 7    | -3.8     | -3.8     | -3.8     |
| 8    | Dihydrogenphosphate | 8    | -3.8     | -3.8     | -3.8     |
| 9    | Dihydrogenphosphate | 9    | -3.7     | -3.8     | -3.8     |
| 10   | Dihydrogenphosphate | 10   | -3.7     | -3.6     | -3.8     |

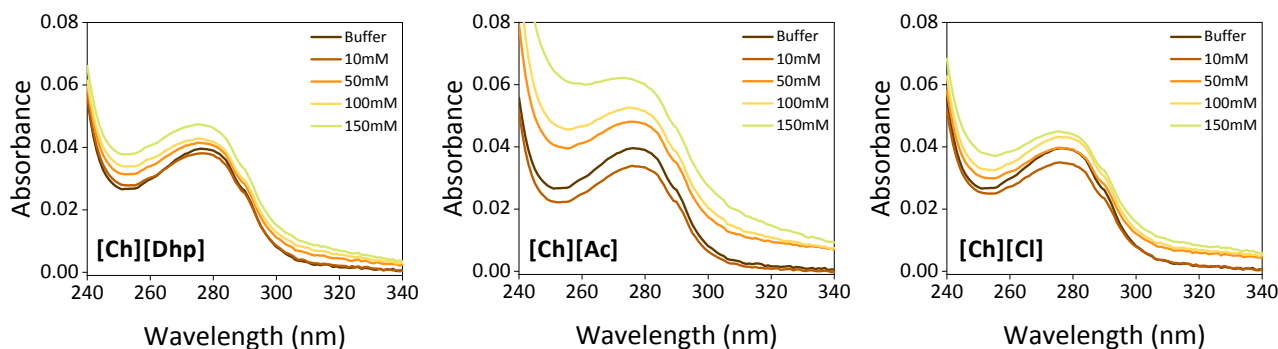

**Figure S3.** UV-vis spectra of *RgPAL* in its aromatic region showing the effect of hydration on interactions with (a) [Ch][Cl], (b) [Ch][Ac] and (c) [Ch][Dhp] ILs.

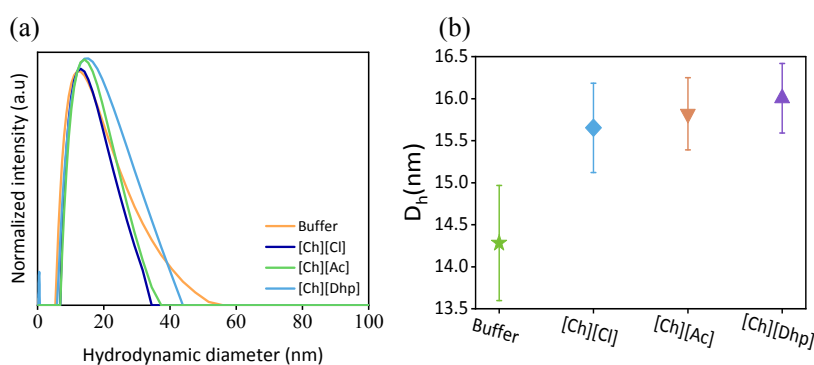

**Figure S4.** (a) Distribution curves of *RgPAL* and (b) corresponding average hydrodynamic diameter in buffer and ILs media.

**Table S5:** The values of change in enthalpy ( $\Delta H$ ) and entropy ( $\Delta S$ ) of protein unfolding in buffer and IL+Tris-HCl systems.

|           | $\Delta H_{f_u}$ (kcal mol <sup>-1</sup> ) | $\Delta S_{f_u}$ (kcal K <sup>-1</sup> mol <sup>-1</sup> ) |
|-----------|--------------------------------------------|------------------------------------------------------------|
| Buffer    | 24.53022 ± 0.12369                         | 0.07351 ± 6.38E-4                                          |
| [Ch][Cl]  | 19.07332 ± 0.24056                         | 0.05615 ± 4.09E-4                                          |
| [Ch][Ac]  | 20.28178 ± 0.23637                         | 0.05972 ± 7.01E-5                                          |
| [Ch][Dhp] | 20.72396 ± 0.11458                         | 0.06118 ± 5.72E-4                                          |
